# Supplementary figures and images for: Effects of sintilimab plus chemotherapy as first-line treatment on health-related quality of life in patients with advanced esophageal squamous cell carcinoma: results from the randomized phase 3 ORIENT-15 study
Source: PubMed Central journal article supplement — eClinicalMedicine. 2024 May 17;72:102623. doi: 10.1016/j.eclinm.2024.102623 (PMC11127225; doi:10.1016/j.eclinm.2024.102623), 2024-05-17

**A**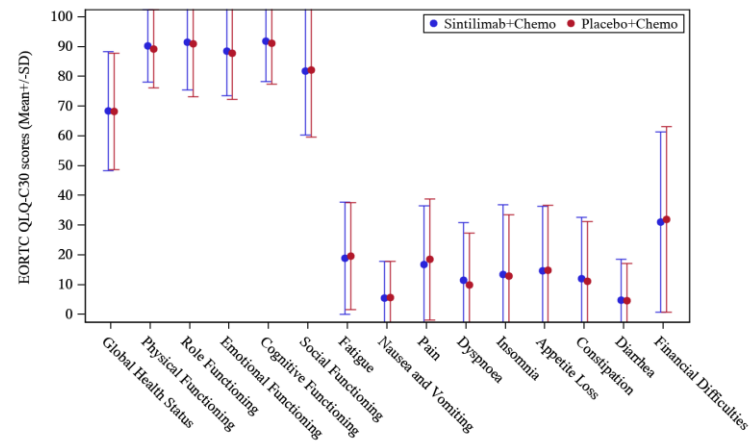**B**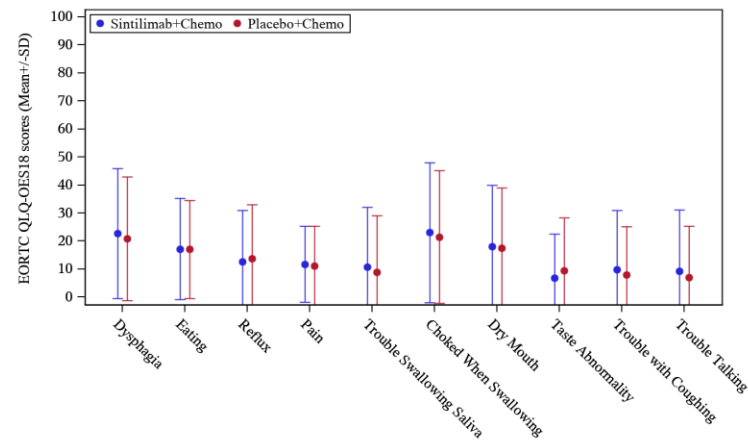**C**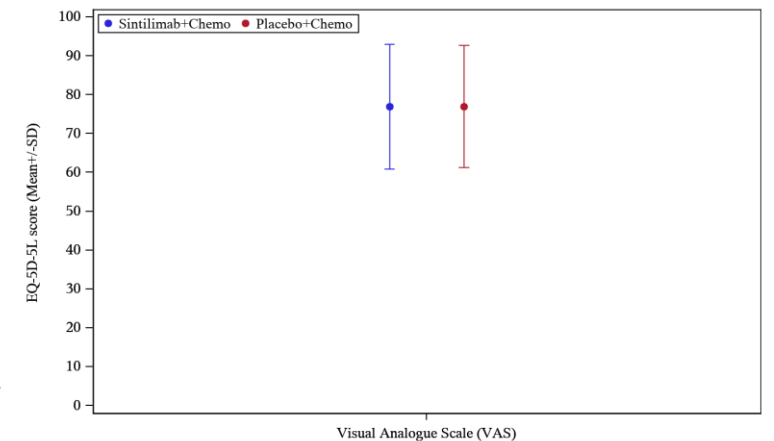

Supplement: mmc2.pdf [file mmc2.pdf]

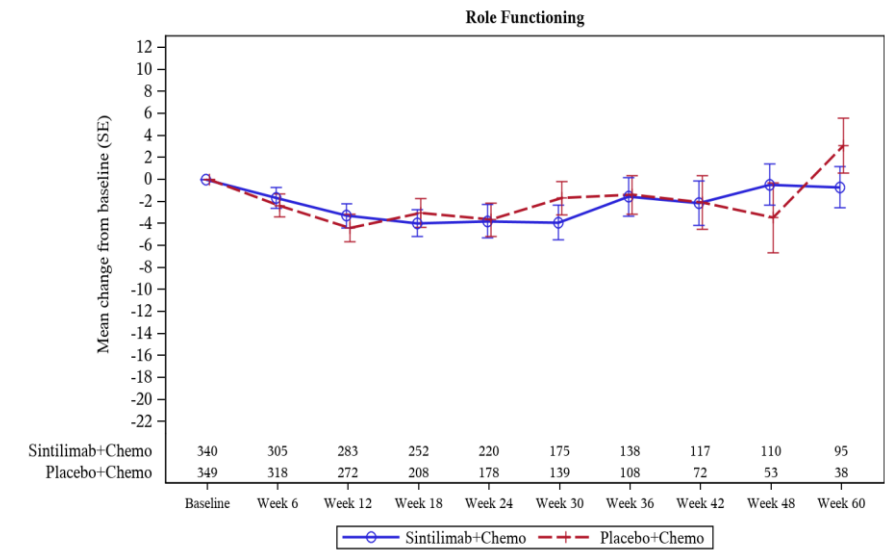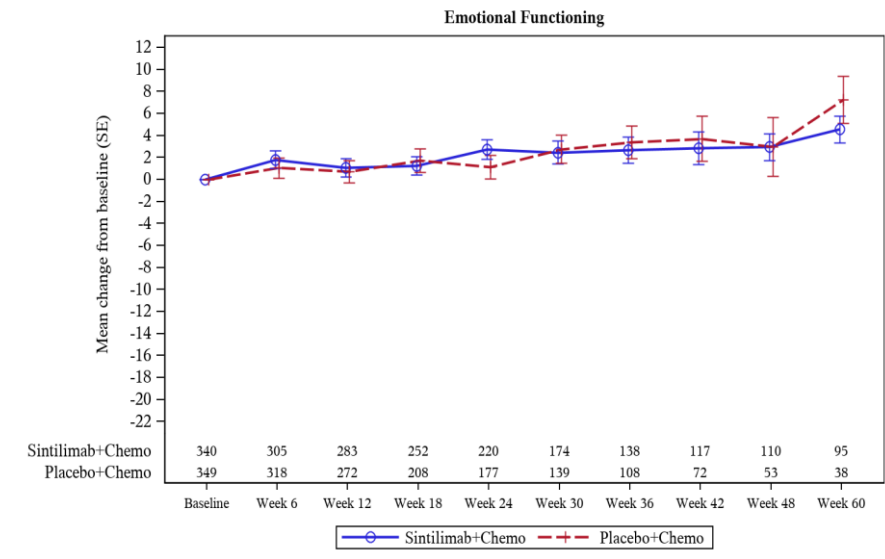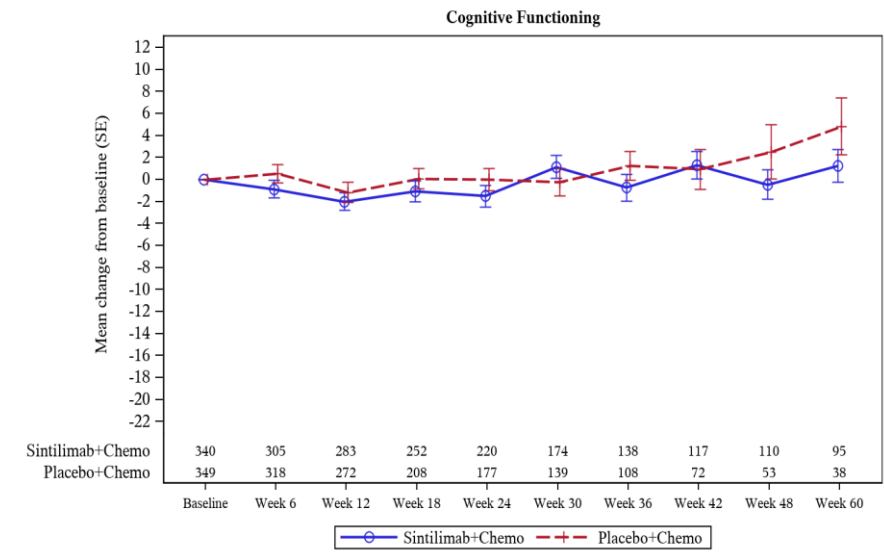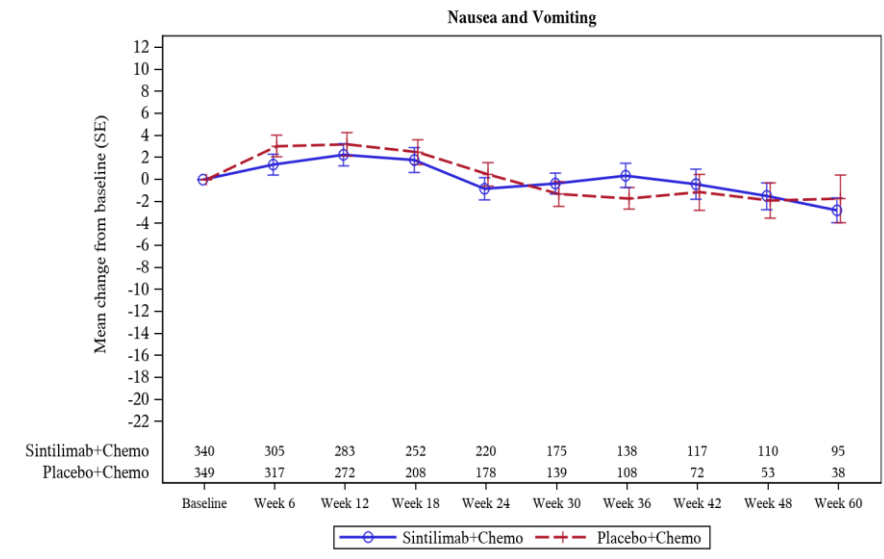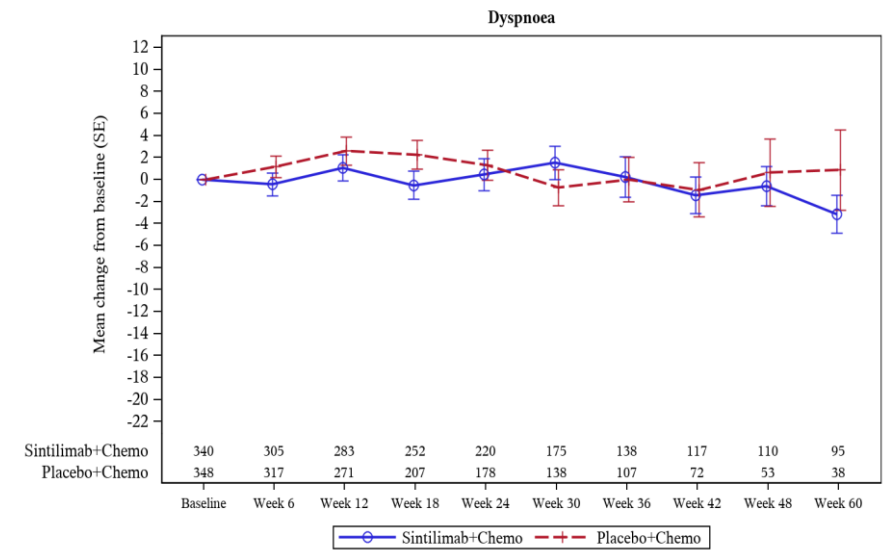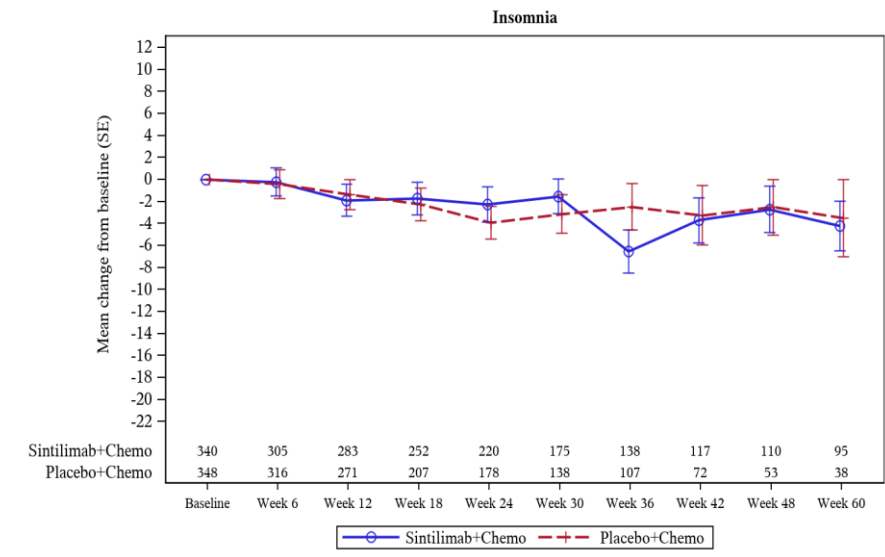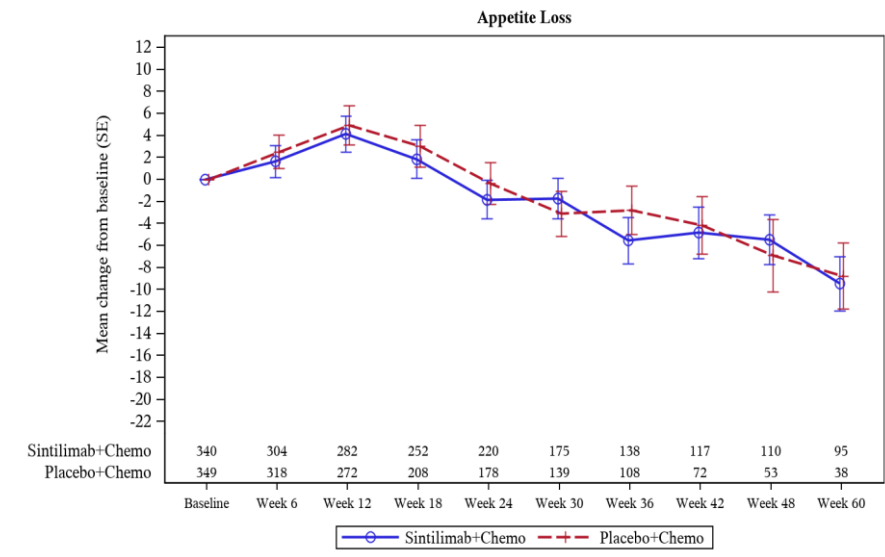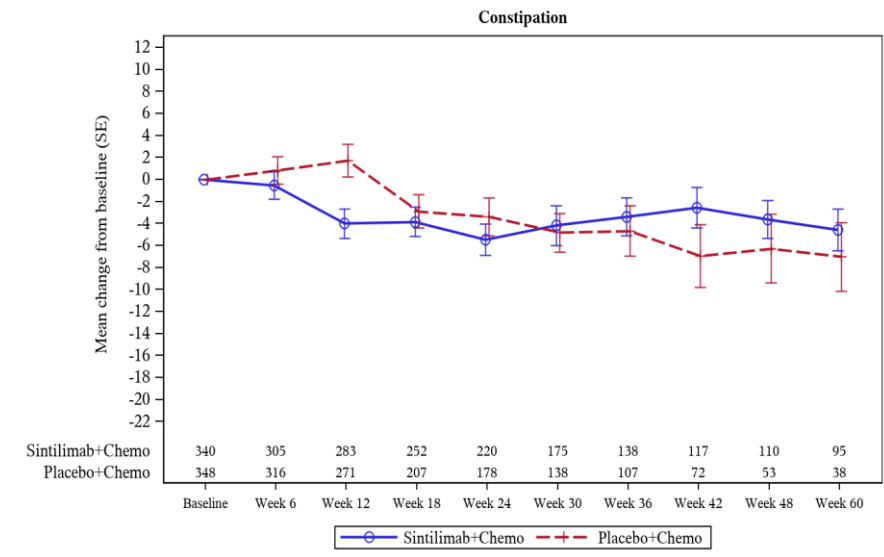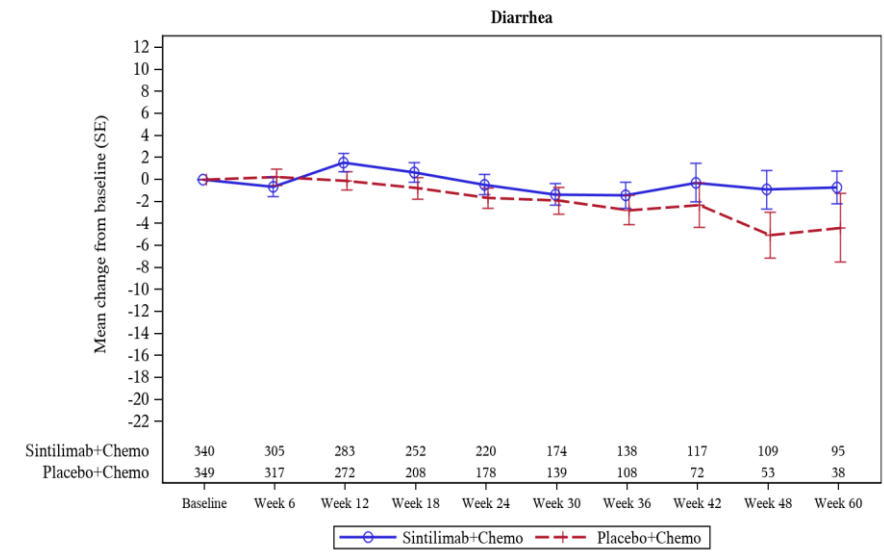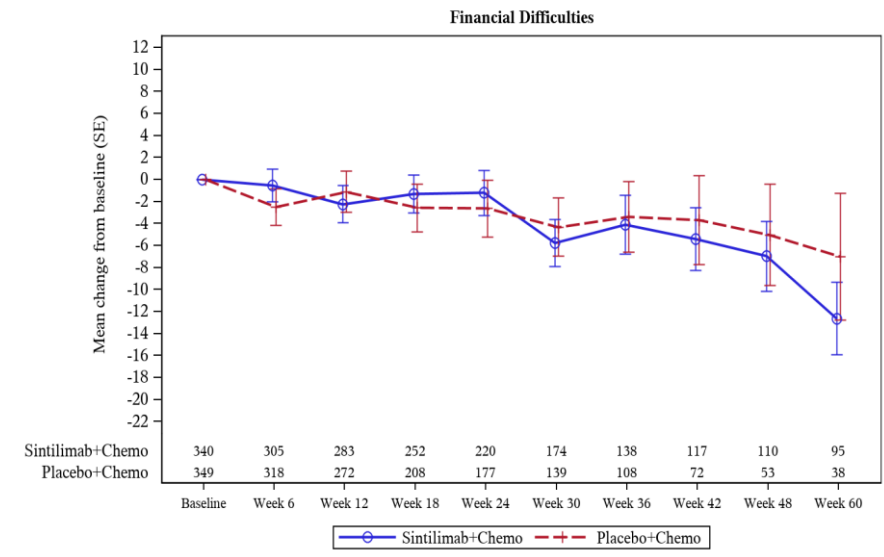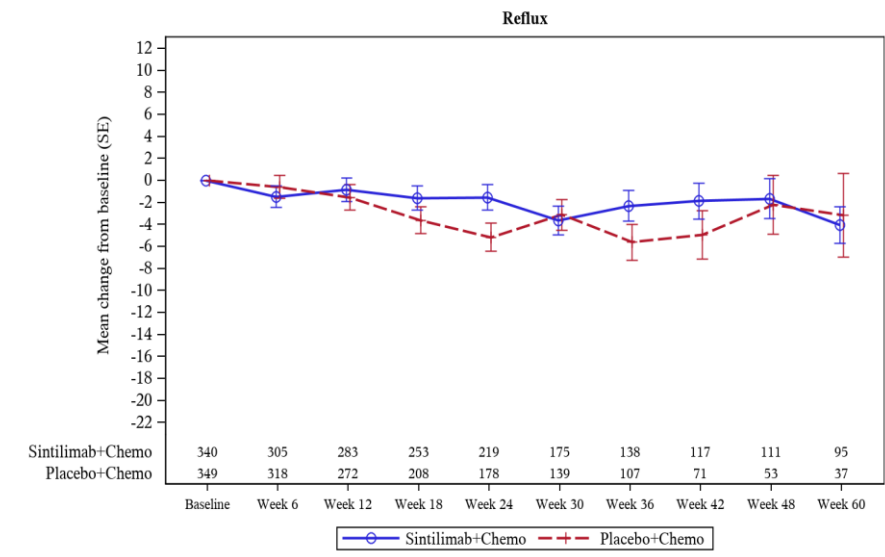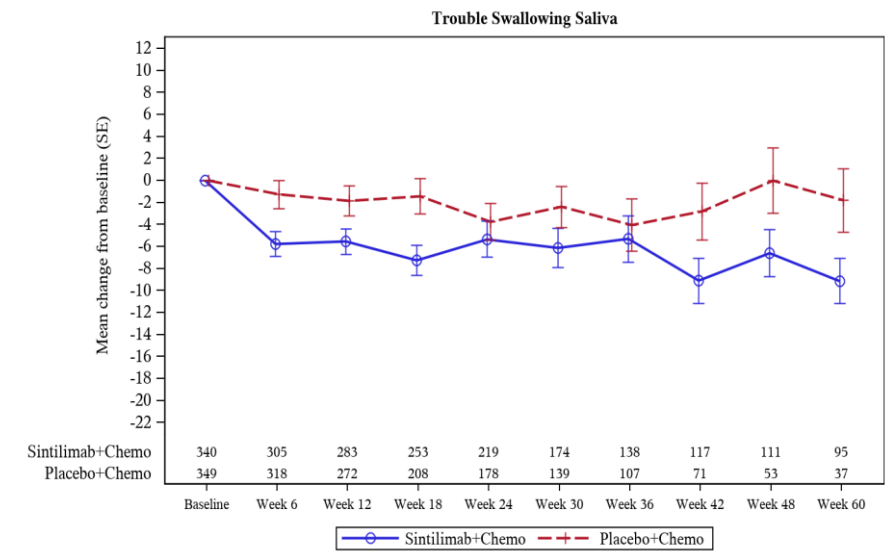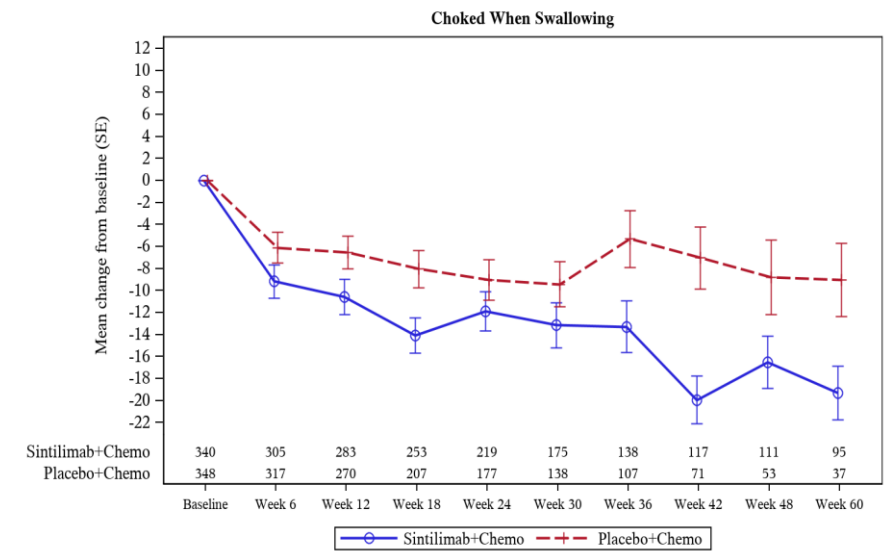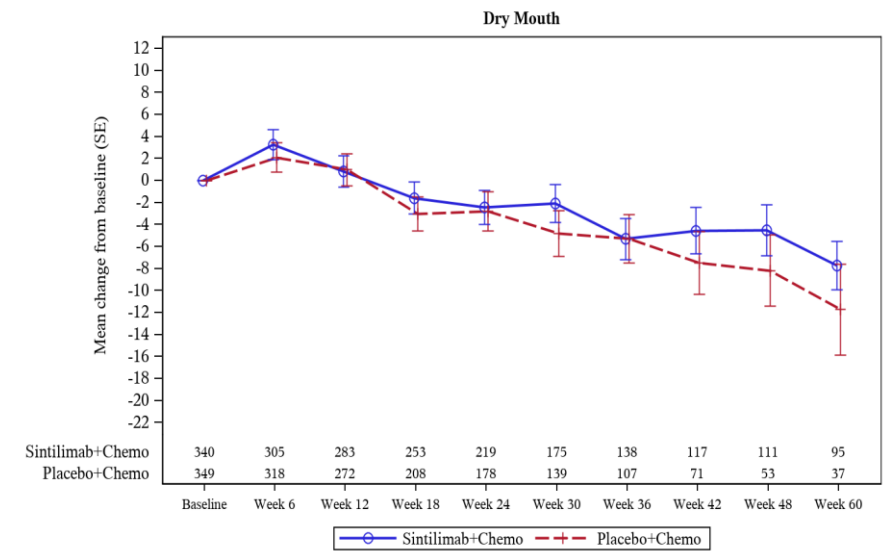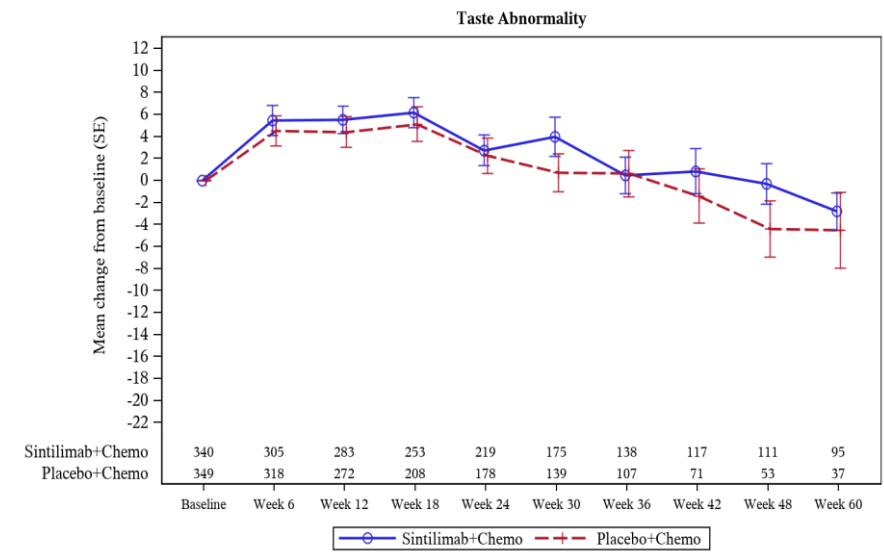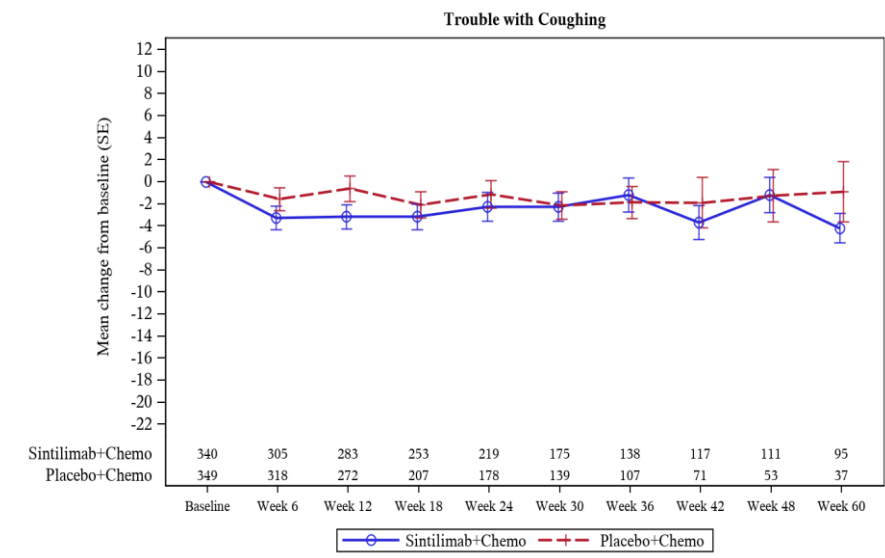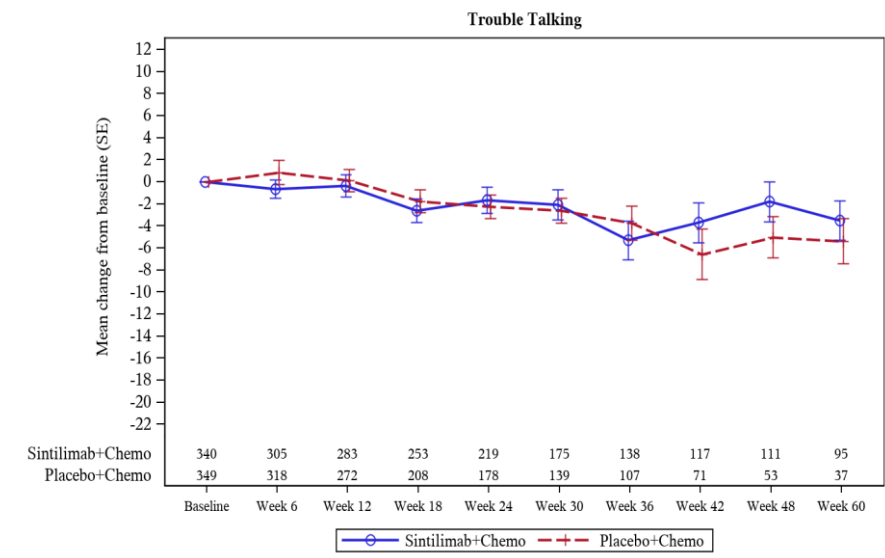

Supplement: mmc3.pdf [file mmc3.pdf]

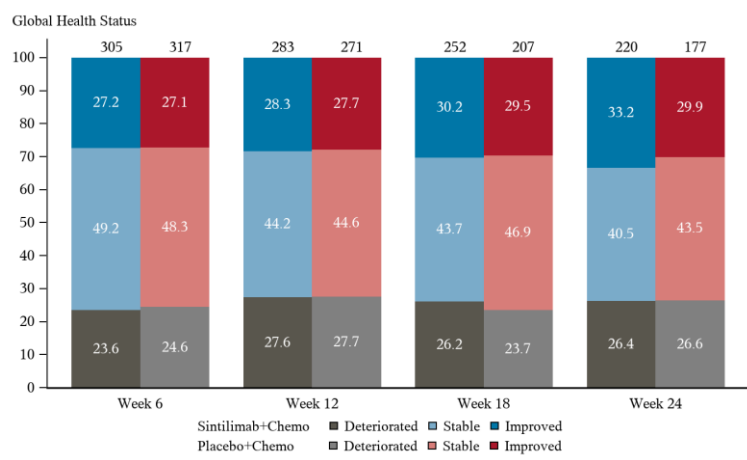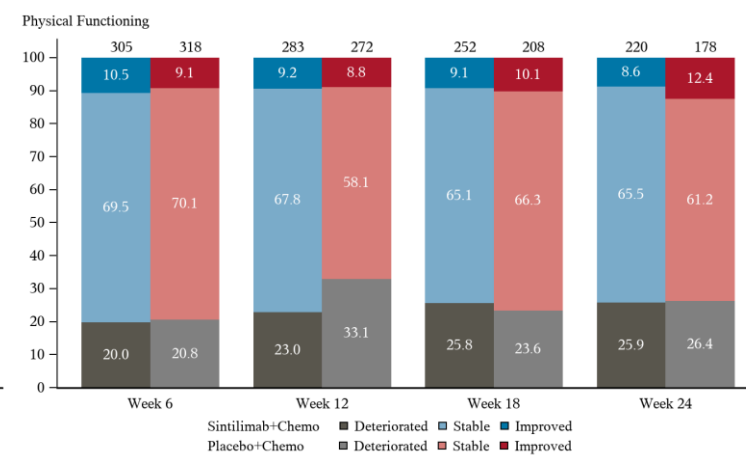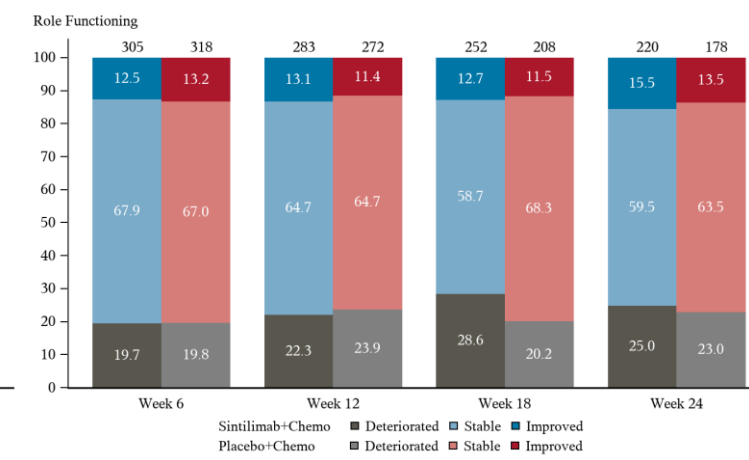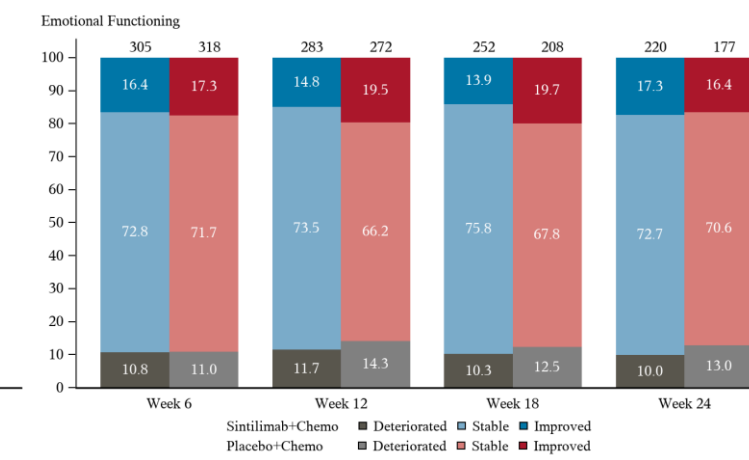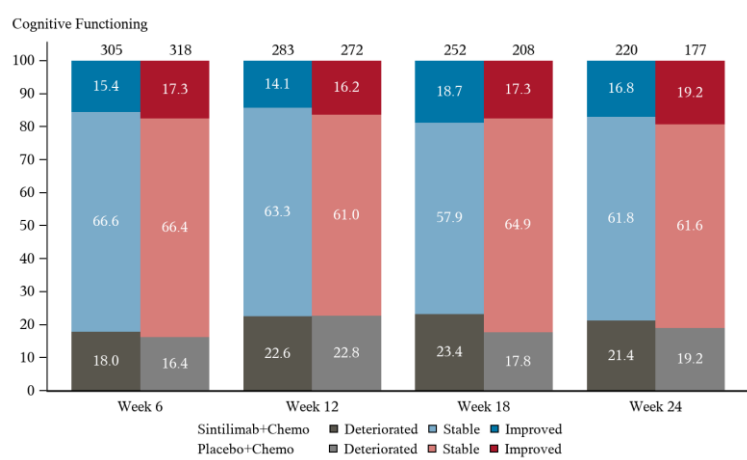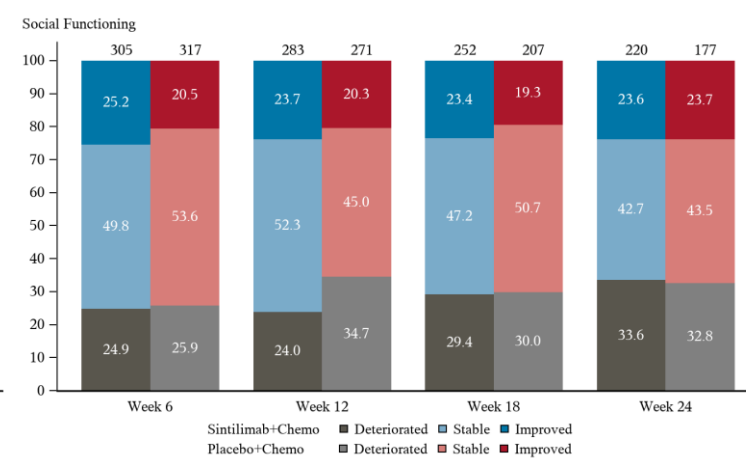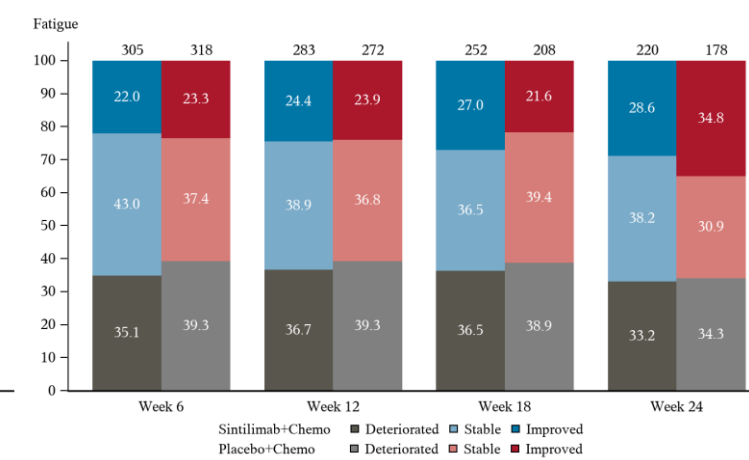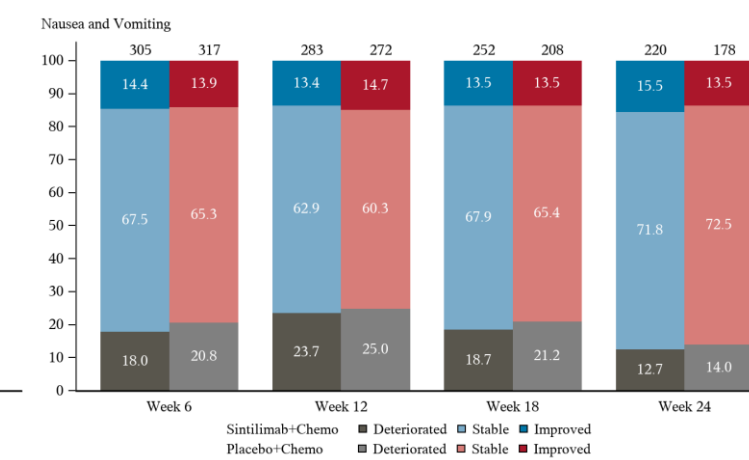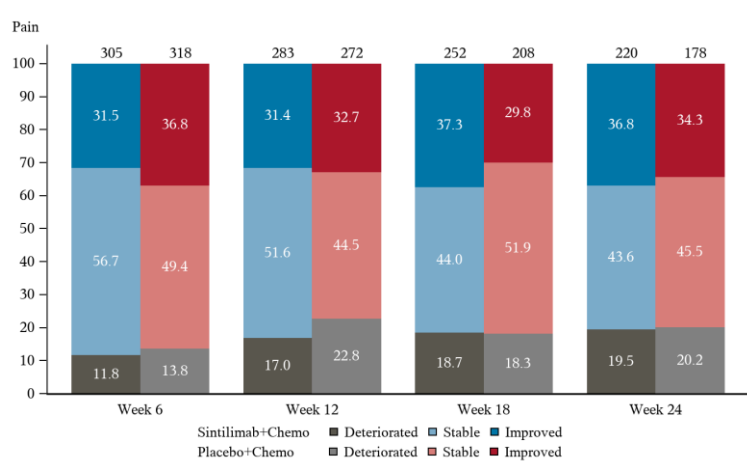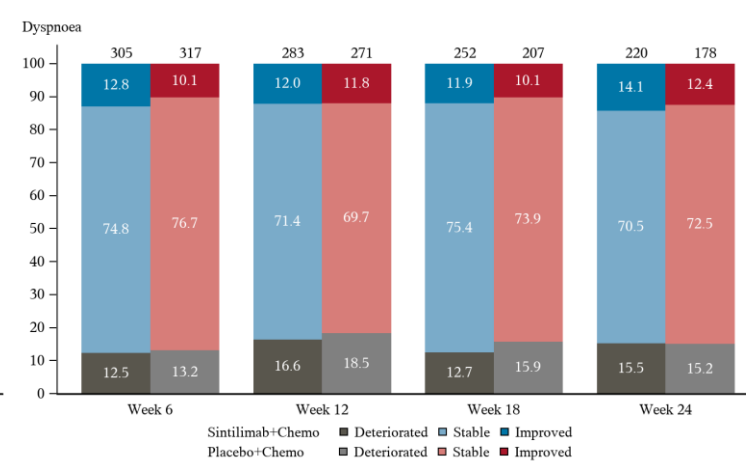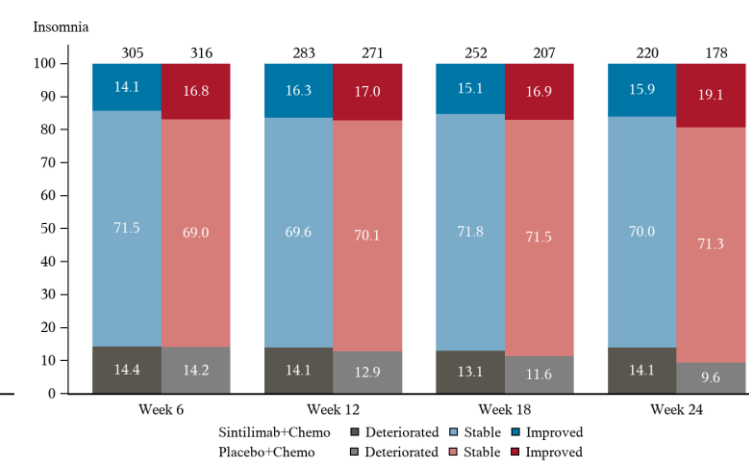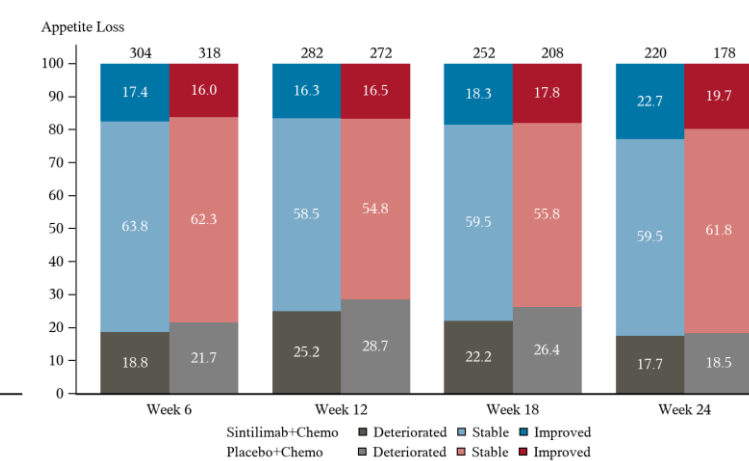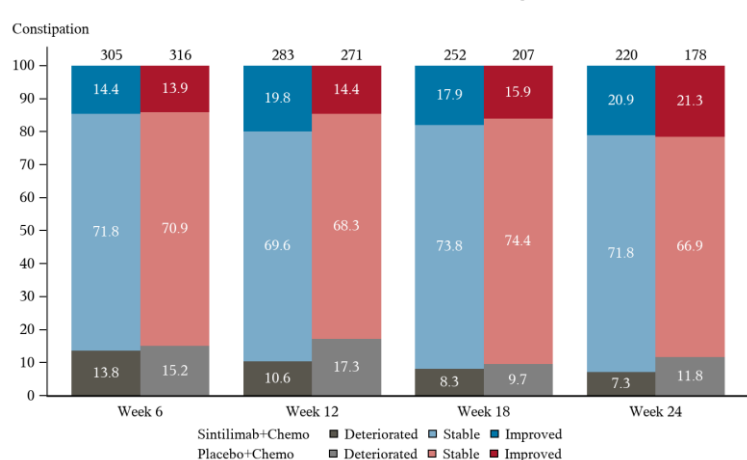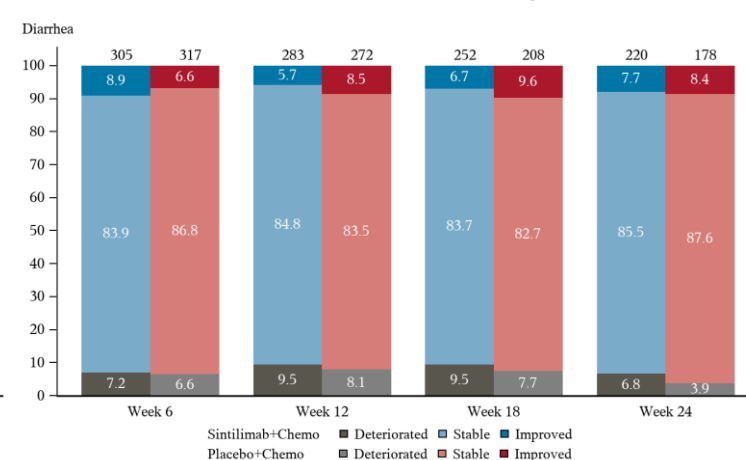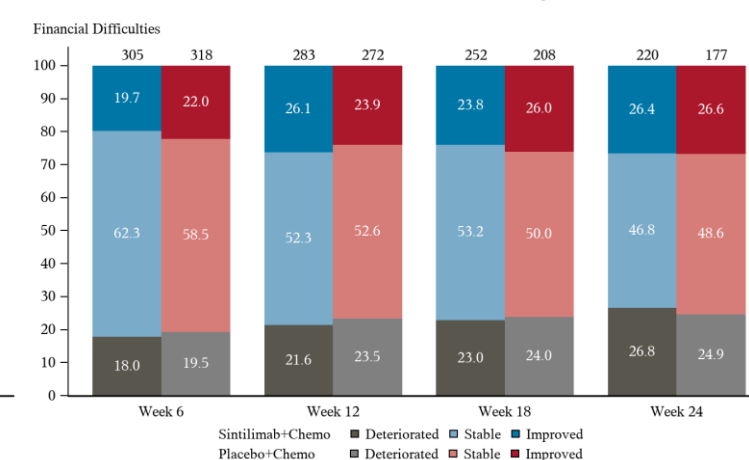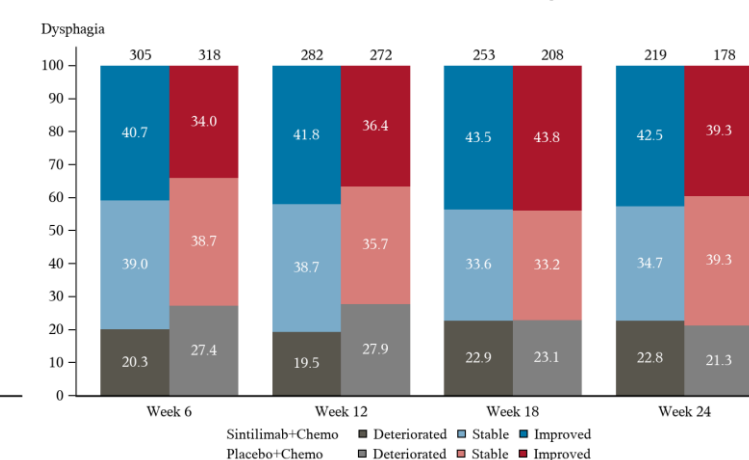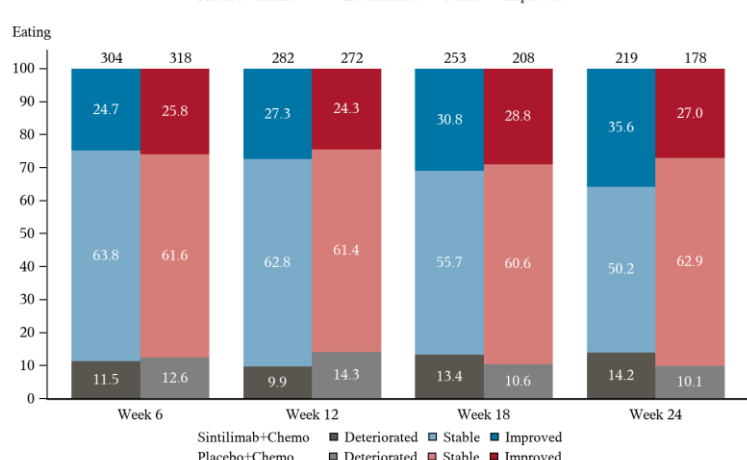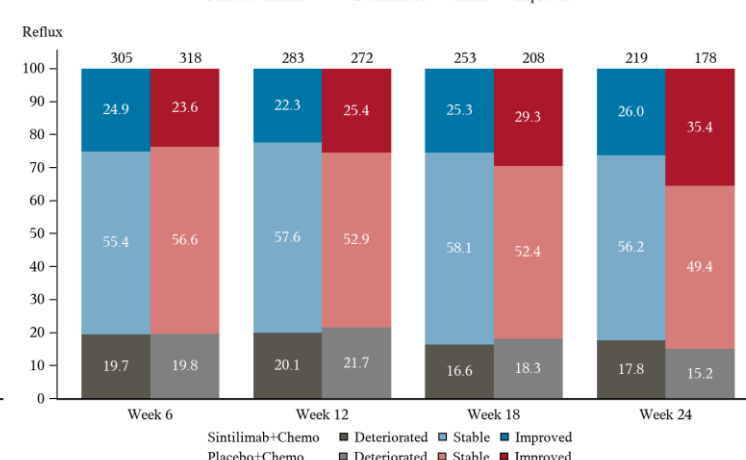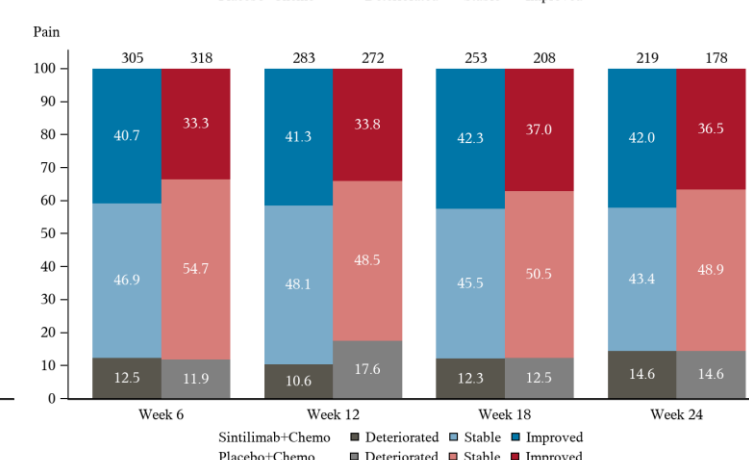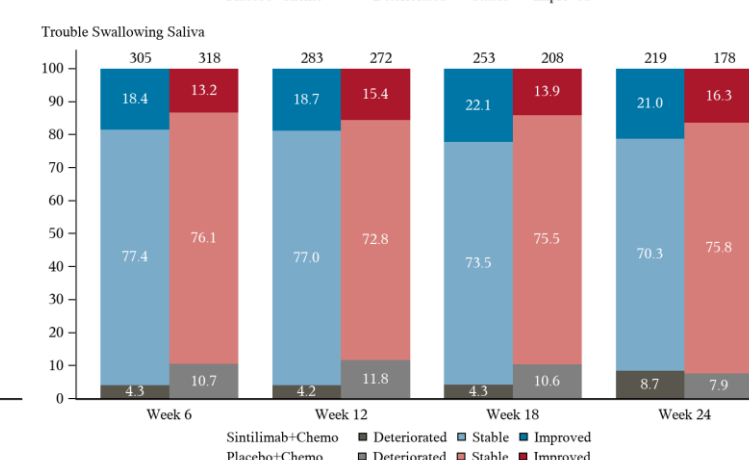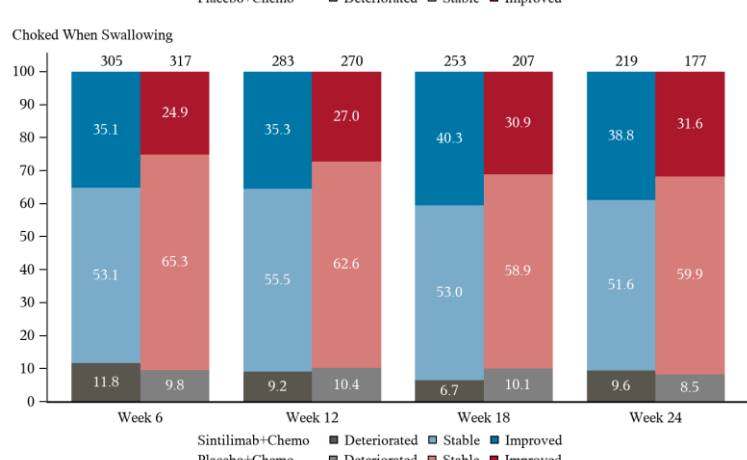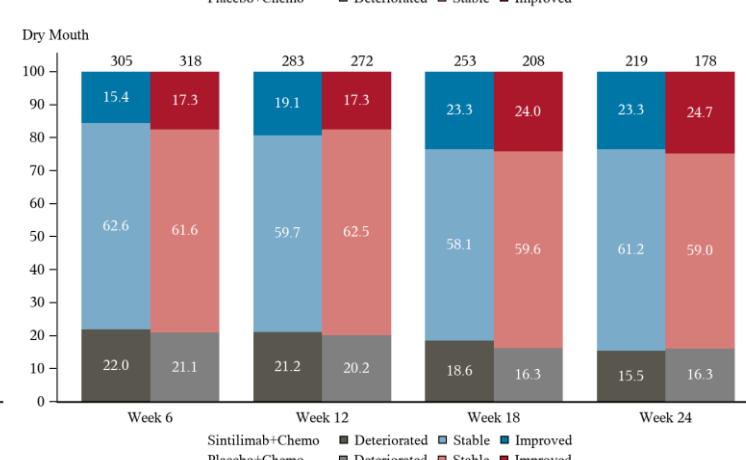

Supplement: mmc4.pdf [file mmc4.pdf]
